# Supplementary material for: Microneedle-mediated delivery of MIL-100(Fe) as a tumor microenvironment-responsive biodegradable nanoplatform for O2-evolving chemophototherapy
Source: Royal Society of Chemistry journal article supplement (doi:10.1039/d1bm00888a), 2021-01-01
Supplement: d1bm00888a1.pdf [file d1bm00888a1.pdf]

## Supporting information

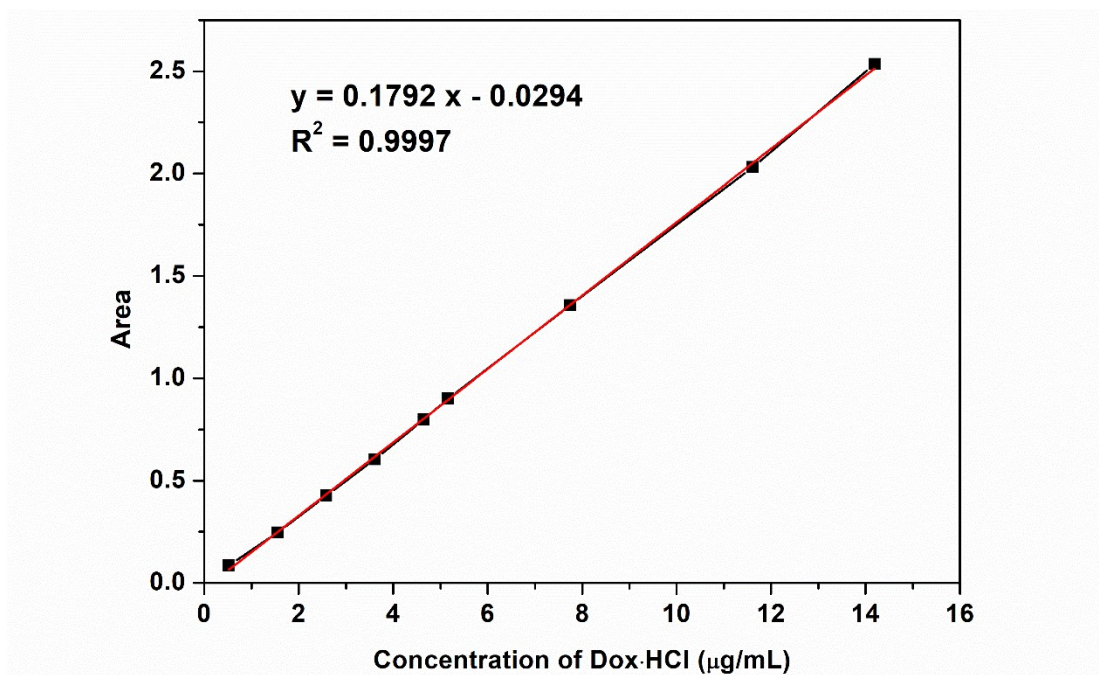

Figure. S1. Calibration curve of Dox via HPLC

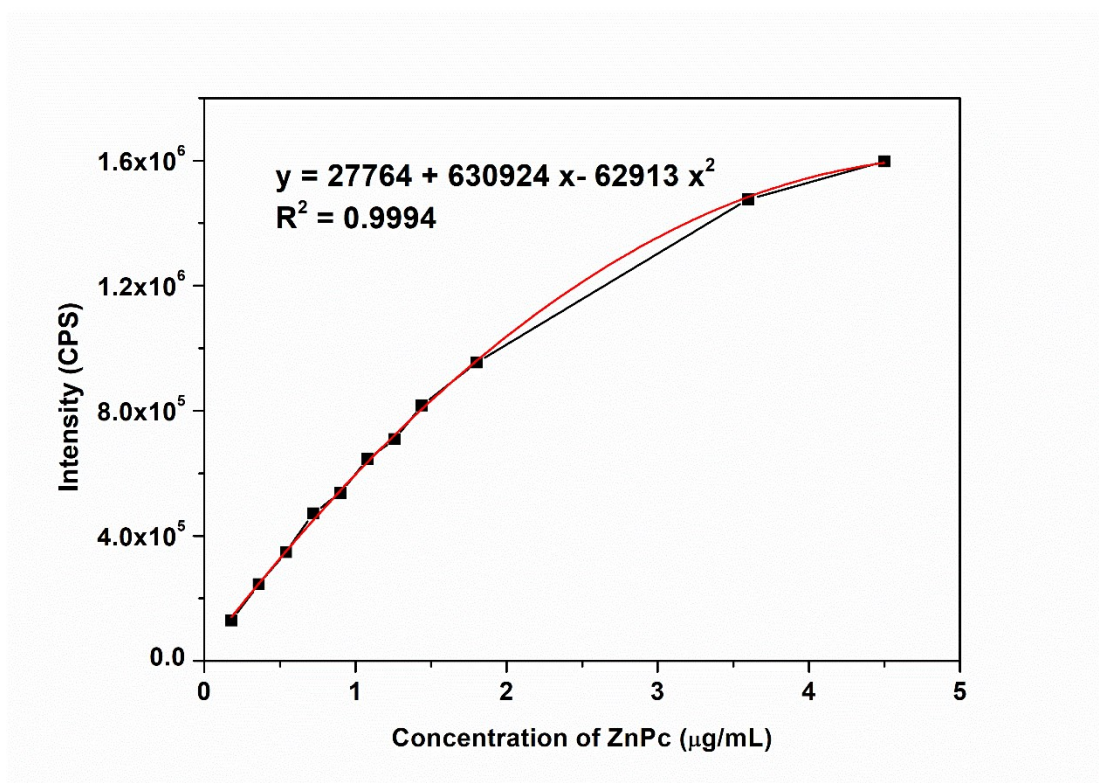

Figure. S2. Calibration curve of ZnPc via fluorescence spectrum.

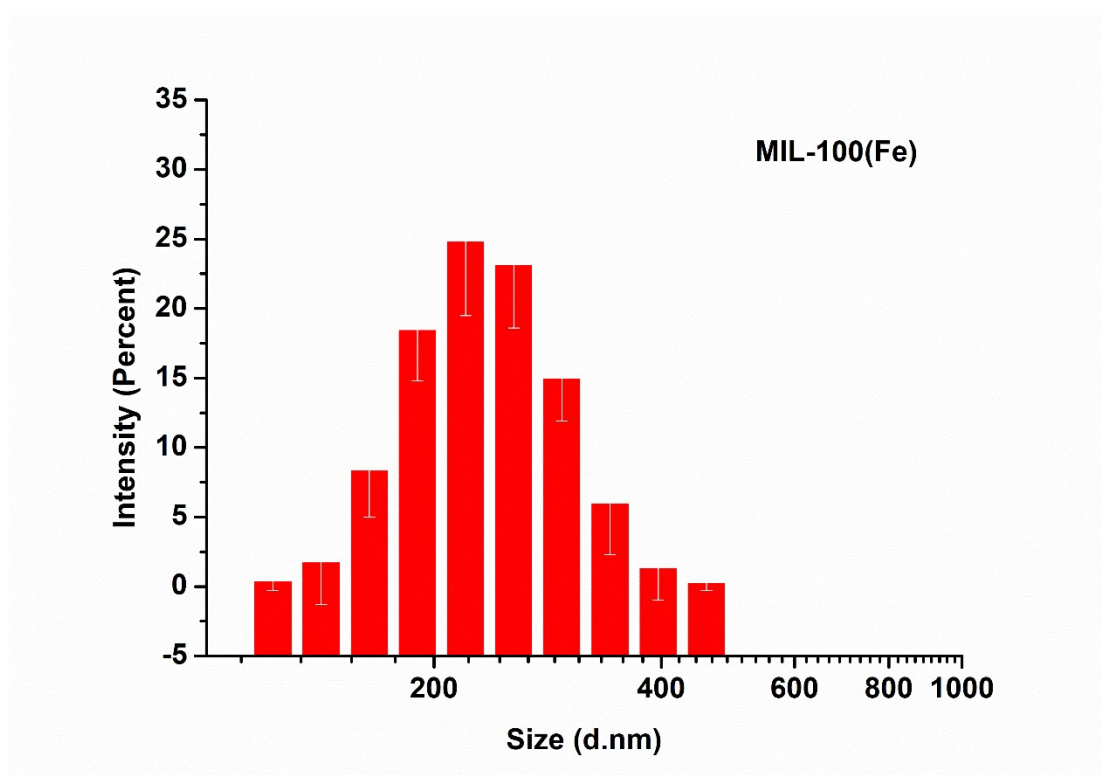

**Figure. S3.** Particle size distribution of MIL-100(Fe).

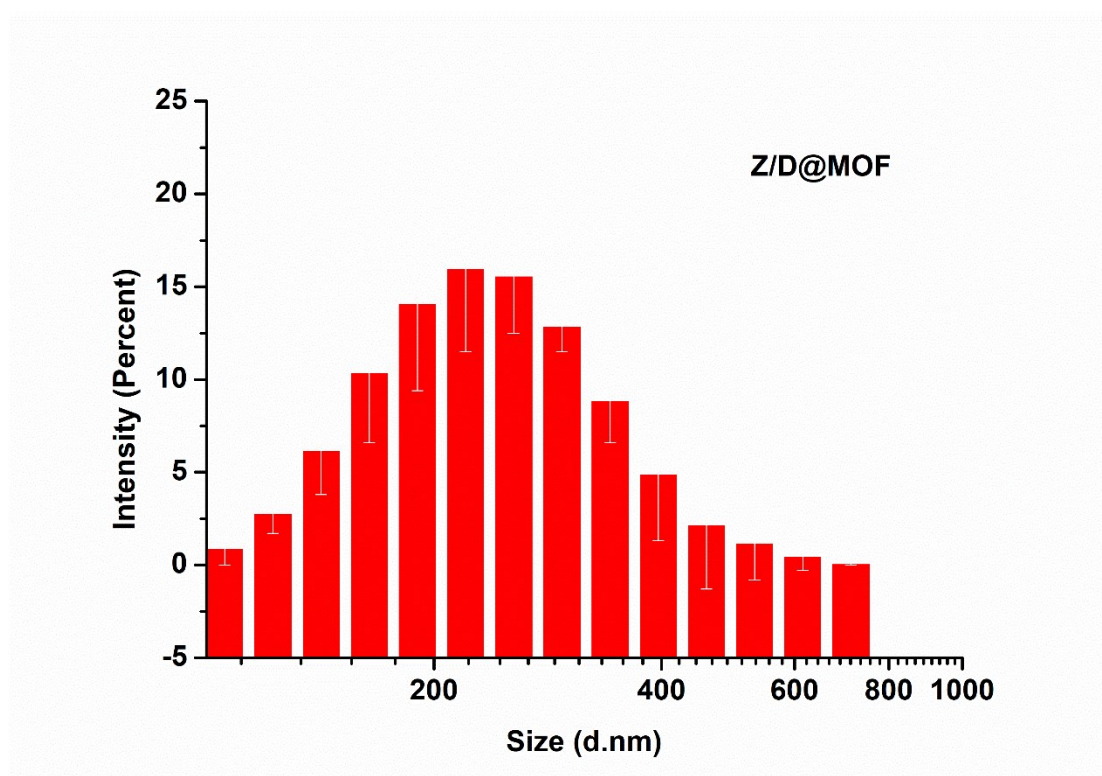

**Figure. S4.** Particle size distribution of Z/D@MOF.

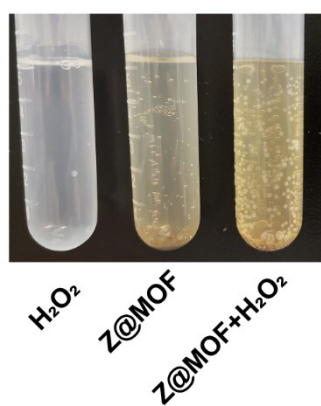

**Figure. S5.** Photographs of Z@MOF incubated with or without 20 mM  $H_2O_2$ .

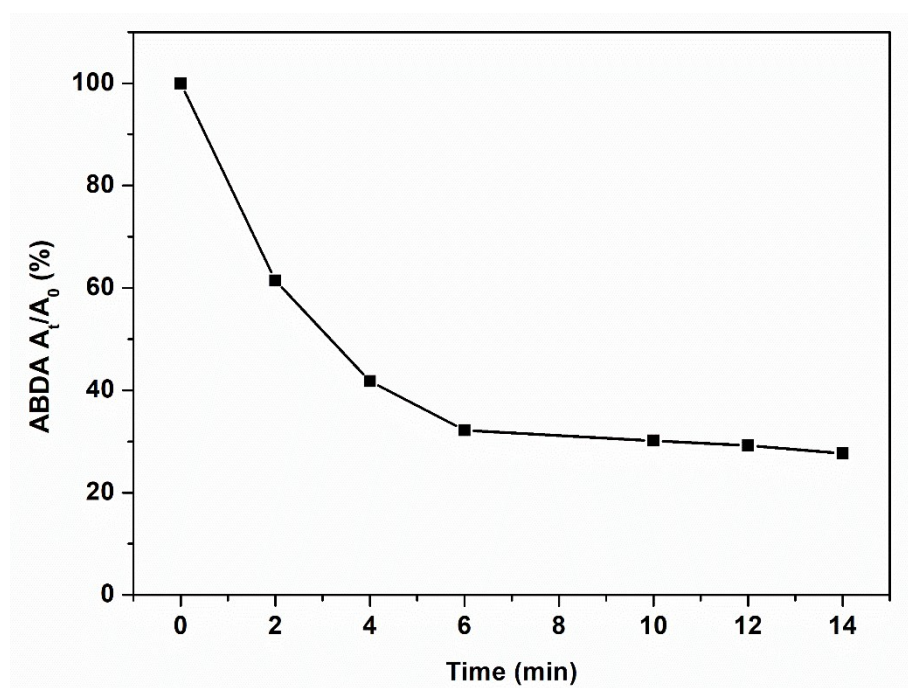

**Figure. S6.** Relative absorbance of ABDA in Z@MOF solution under normoxic condition with light irradiation.



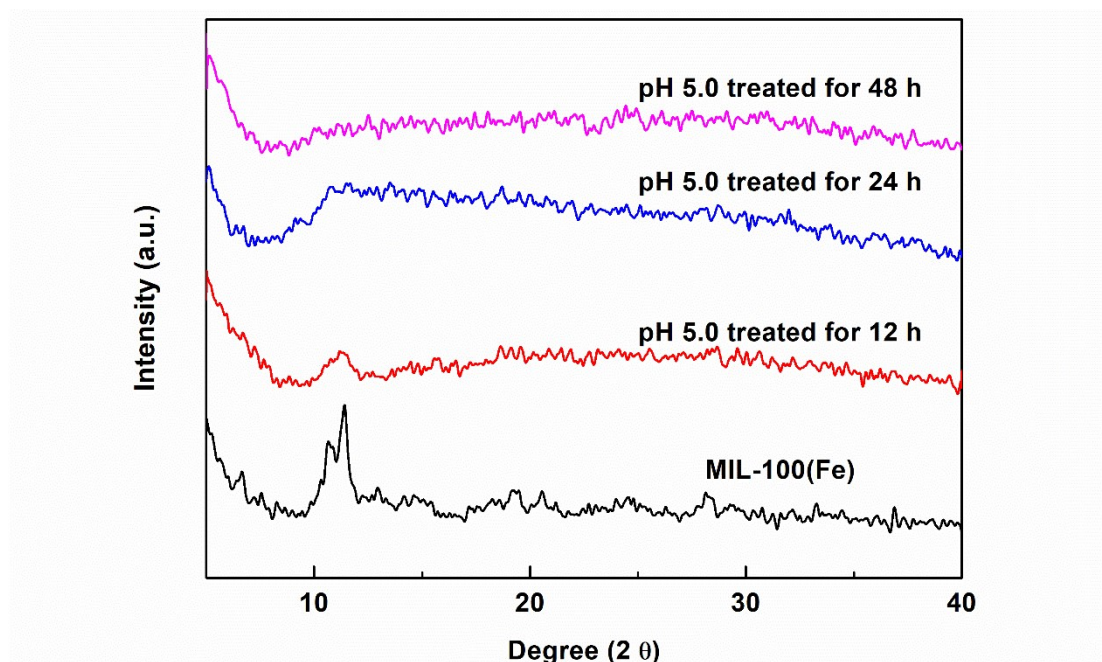

**Figure. S7.** XRD patterns of MIL-100(Fe) soaked in pH5.0 buffer for different time.

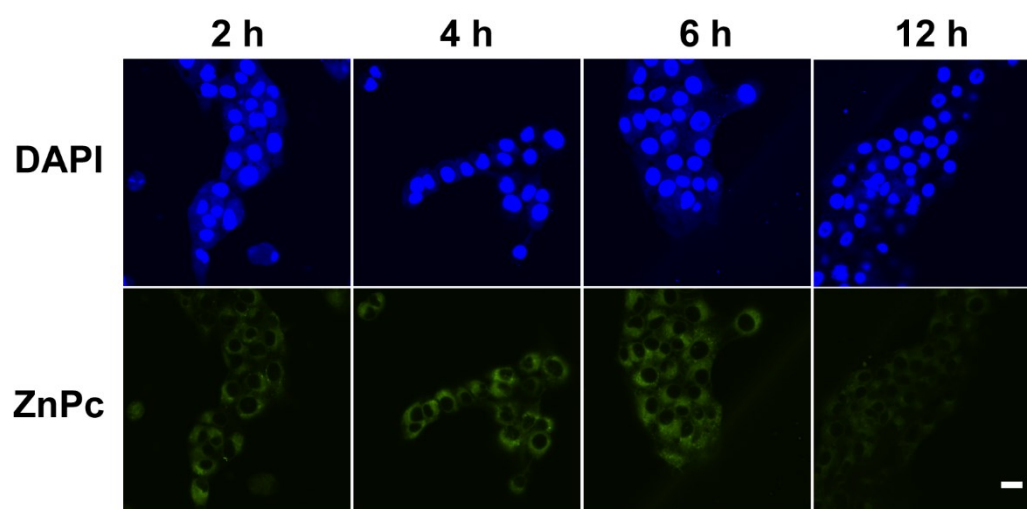

**Figure. S8.** CLSM images of 4T1 cells incubated with ZnPc for different time (Scale bar: 20  $\mu$ m).

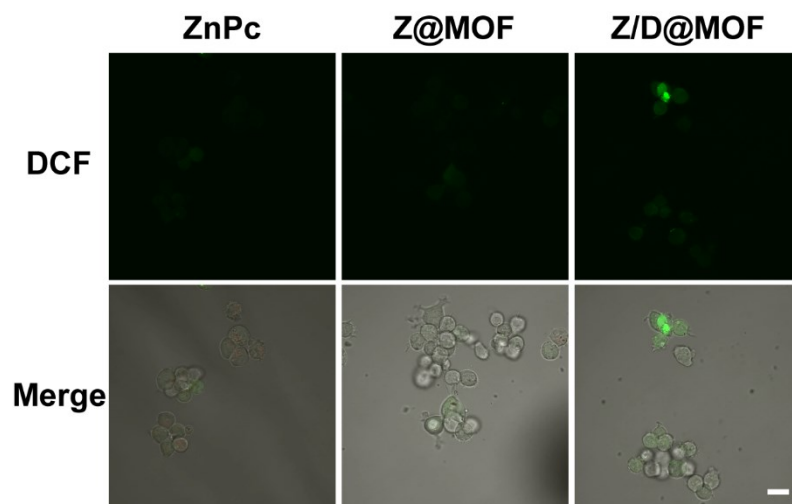

**Figure. S9.** Intracellular ROS detection after treated with ZnPc, Z@MOF, and Z/D@MOF without 660 nm laser irradiation (Scale bar: 20  $\mu$ m).

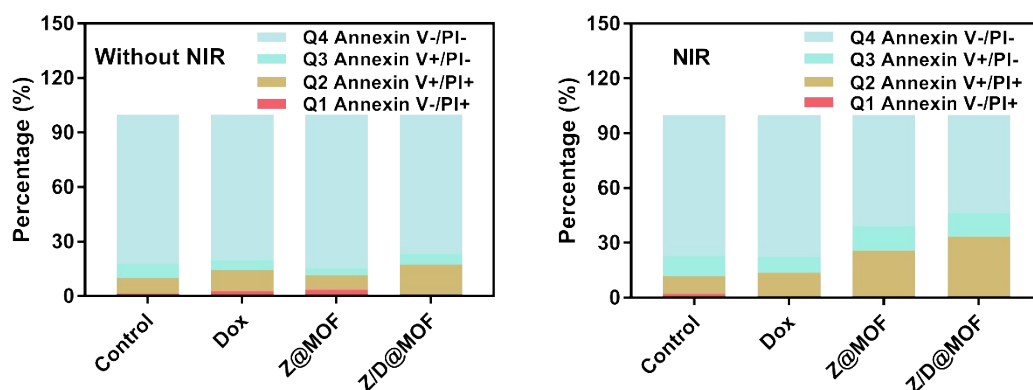

**Figure. S10.** Statistical percentage of 4T1 cells in different stages determined by flow cytometric analysis.

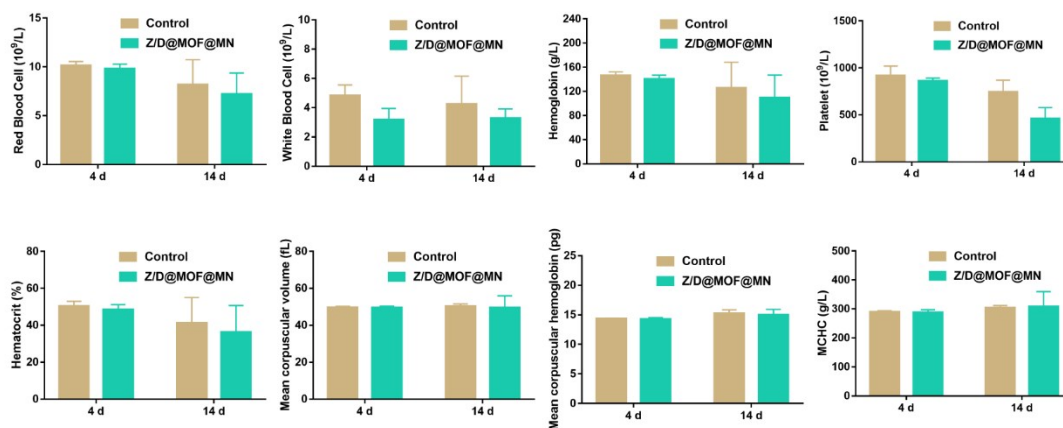

**Figure. S11.** The blood routine parameters of mice after treated with Z/D@MOF@MN for 4 d and 14 d.

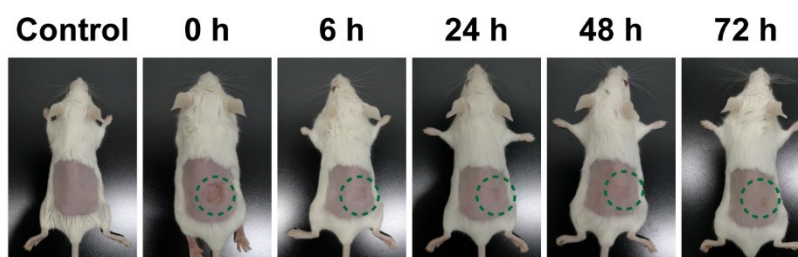

**Figure. S12.** Photographs of mouse dorsal skin after Z/D@MOF@MN insertion.

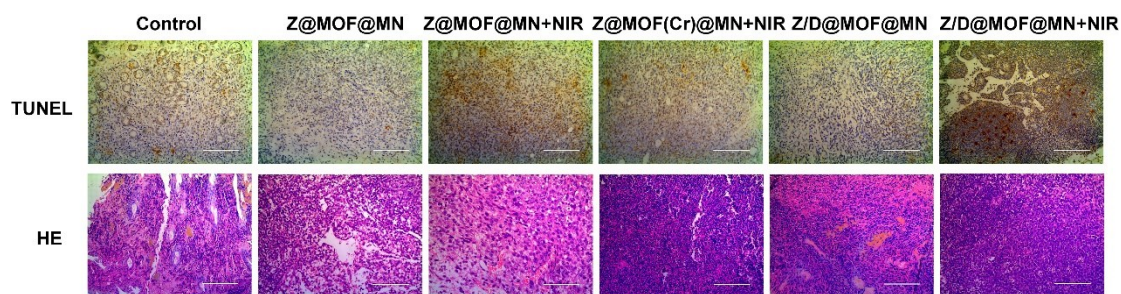

**Figure. S13.** H&E and TUNEL stained images of tumor tissues after receiving various treatments.

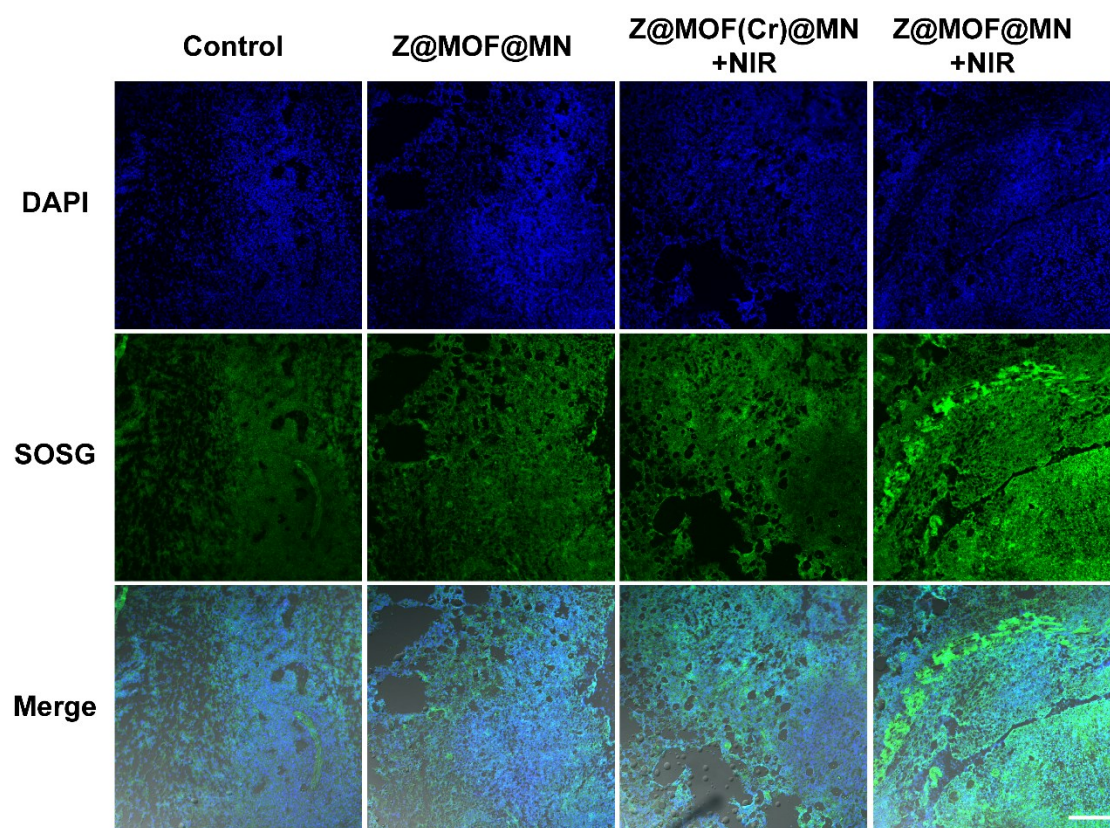

**Figure. S14.** SOSG staining of tumor tissues collected from mice after different treatments. The nuclei were stained with DAPI (blue) and ROS was stained with SOSG (green). (Scale bar: 200  $\mu\text{m}$ )
